# Supplementary material for: Integrative Analysis of Long Non-coding RNAs, Messenger RNAs, and MicroRNAs Indicates the Neurodevelopmental Dysfunction in the Hippocampus of Gut Microbiota-Dysbiosis Mice
Source: PubMed Central journal article supplement (PMC8787131; doi:10.3389/fnmol.2021.745437), 2022-01-11
Supplement: Image_1.pdf [file Image_1.pdf]

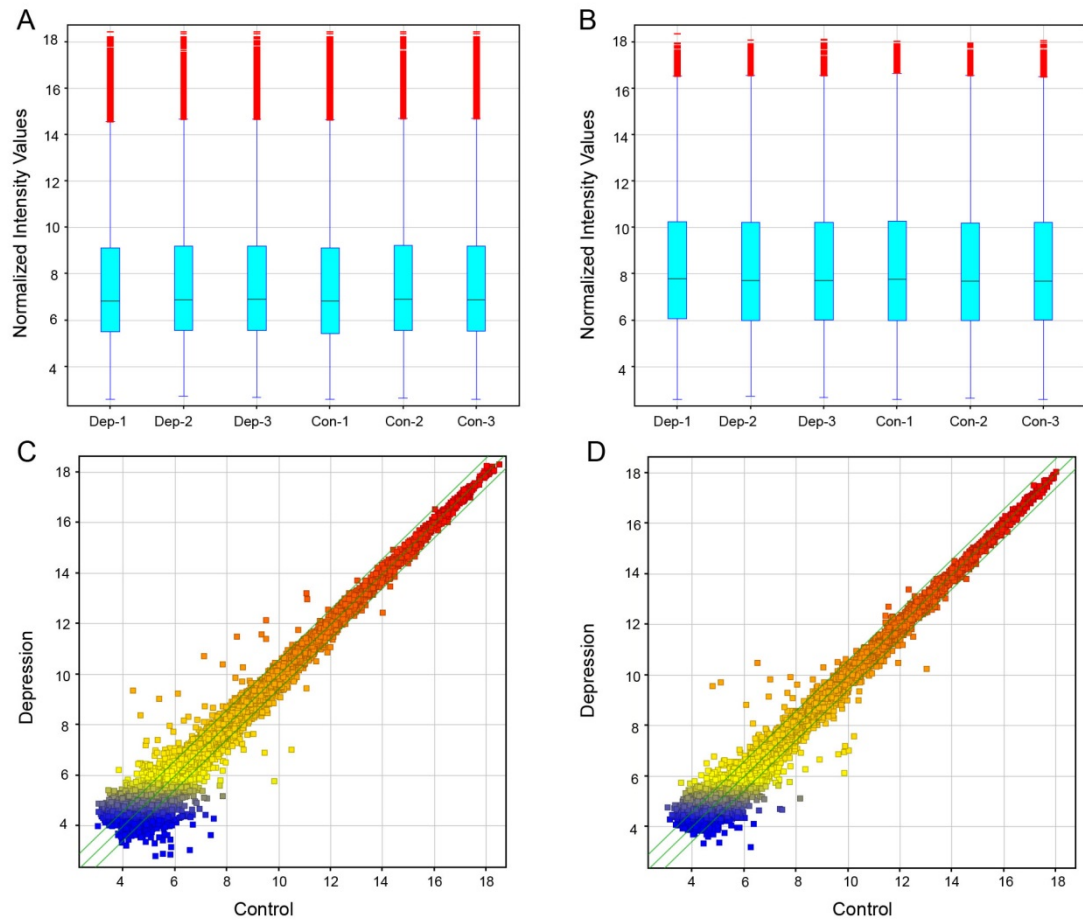

**Figure S1.** Quality assessment of lncRNA and mRNA data after filtering. (A) Box-plot of lncRNAs showing that the distributions of normalized intensities among all tested samples are nearly the same. (B) Box-plot of mRNAs showing that the distributions of normalized intensities among all tested samples are nearly the same. (C) Scatter-plot assessing lncRNA expression variation and reproducibility between the two groups. (D) Scatter-plot assessing mRNA expression variation and reproducibility between the two groups.

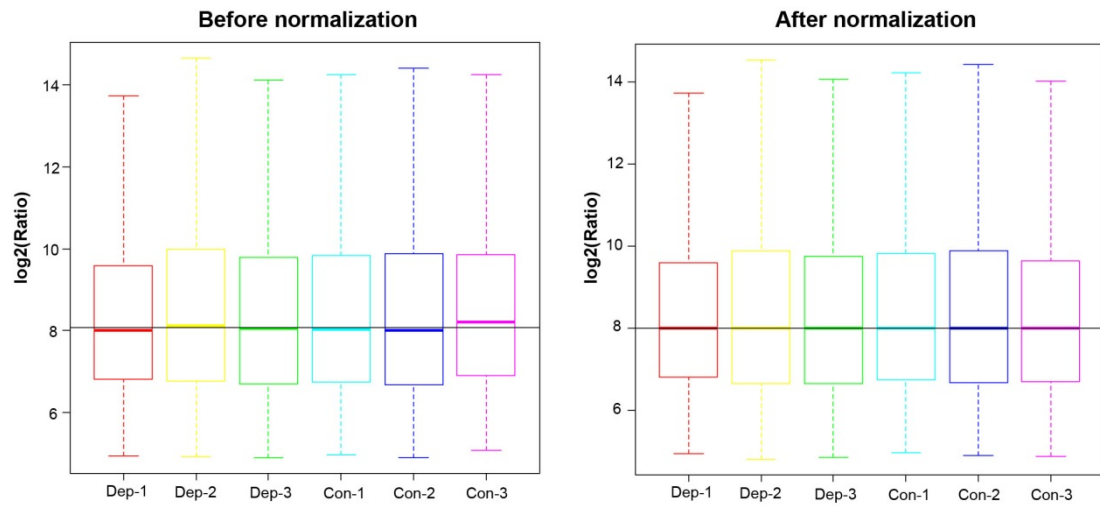

**Figure S2.** Box-plots of miRNAs visualizing the distribution of intensities for each sample before and after normalization.

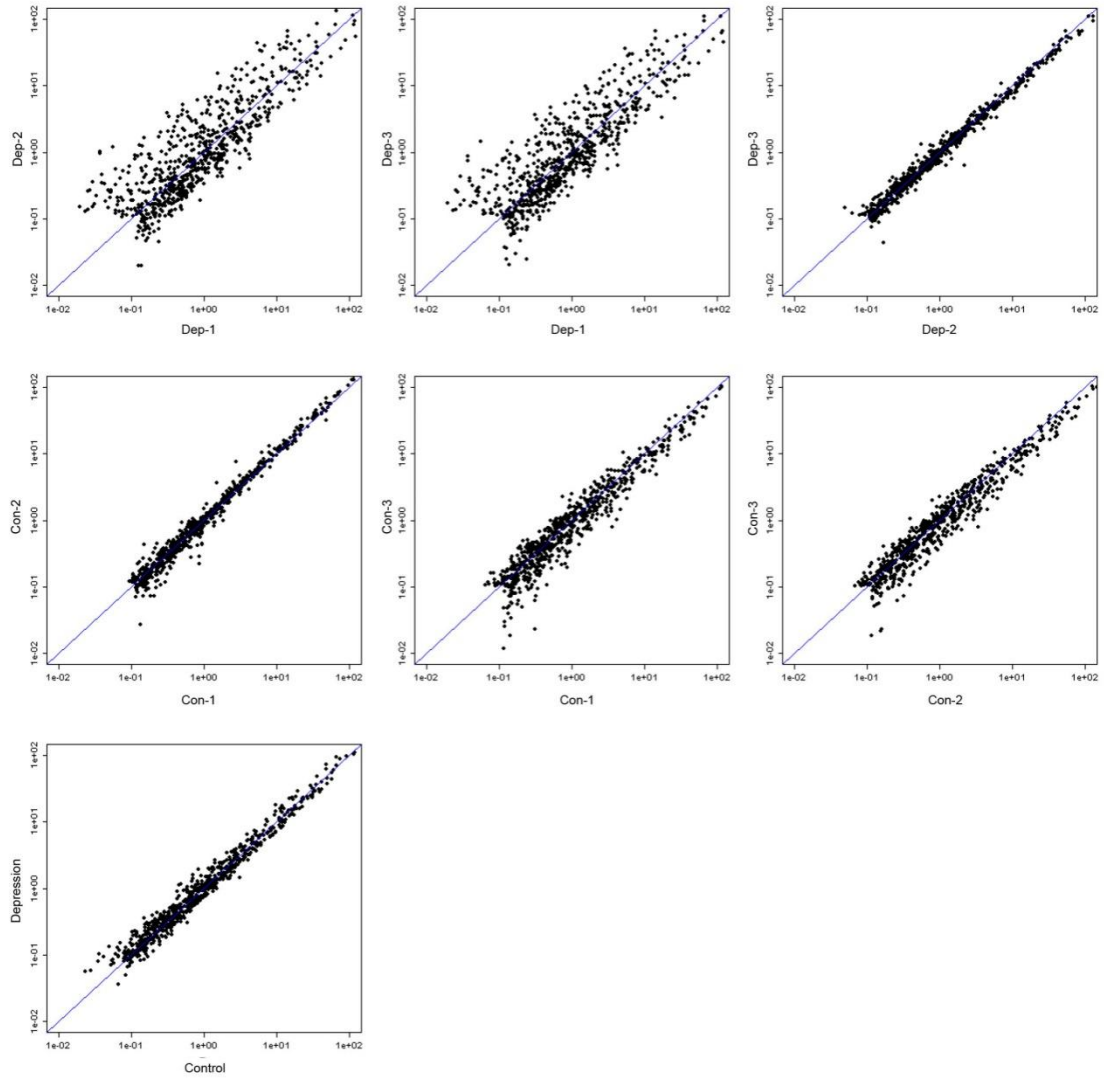

**Figure S3.** Scatter-plots assessing the correlation among replicate experiments.
